# Supplementary material
Source: publisher figshare collection journal article supplement (https://sage.figshare.com/ndownloader/files/34836371)
Supplement: Supplementary file 1 [file 34836371]

**Supplementary file 2: Additional complete cases analyses**

Title: Health-related quality of life in patients with recurrent *Clostridioides difficile*infections

Journal: Therapeutic Advances in Gastroenterology

Authors: Lianna H Hammeken, Simon M D Baunwall, Jens F Dahlerup, Christian L Hvas, Lars H Ehlers

Corresponding author: Lianna H Hammeken. Email: lhham@dcm.aau.dk

**Table 1.** Development of EQ-5D-3L index values between follow-ups for patients with complete data (n=40)

|  | **Increased values,  n (%)** | **Unchanged values, n (%)** | **Decreased values,  n (%)** |
| --- | --- | --- | --- |
| **Complete case** |  |  |  |
| Between baseline and week 8 | 32 (80.0) | 3 (7.5) | 5 (12.5) |
| Between baseline and week 26 | 30 (75.0) | 5 (12.5) | 5 (12.5) |
| Between week 8 and week 26 | 14 (35.0) | 13 (32.5) | 13 (32.5) |

**Table 2.** Answers to the EQ-5D-3L descriptive system for patients with complete data (n=40)

|  | **Level 1, n (%)** | **Level 2, n (%)** | **Level 3, n (%)** | **Level 2 or 3, n (%)** |
| --- | --- | --- | --- | --- |
| **Baseline** |  |  |  |  |
| Mobility | 23 (57.5) | 16 (40.0) | 1 (2.5) | 17 (42.5) |
| Self-care | 31 (77.5) | 5 (12.5) | 4 (10.0) | 9 (22.5) |
| Usual activities | 15 (37.5) | 19 (47.5) | 6 (15.0) | 25 (62.5) |
| Pain/discomfort | 13 (32.5) | 22 (55.0) | 5 (12.5) | 27 (67.5) |
| Anxiety/depression | 26 (65.0) | 14 (35.0) | 0 (0) | 14 (35) |
| Total | 108 (54.0) | 76 (38.0) | 16 (8.0) | 92 (46.0) |
| **Week 8** |  |  |  |  |
| Mobility | 27 (67.5) | 13 (32.5) | 0 (0) | 13 (32.5) |
| Self-care | 31 (77.5) | 9 (22.5) | 0 (0) | 9 (22.5) |
| Usual activities | 27 (67.5) | 11 (27.5) | 2 (5.0) | 13 (32.5) |
| Pain/discomfort | 27 (67.5) | 12 (30.0) | 1 (2.5) | 13 (32.5) |
| Anxiety/depression | 32 (80.0) | 8 (20.0) | 0 (0) | 8 (20) |
| Total | 144 (72.0) | 53 (26.5) | 3 (1.5) | 56 (28.0) |
| **Week 26** |  |  |  |  |
| Mobility | 24 (60.0) | 16 (40.0) | 0 (0) | 16 (40) |
| Self-care | 30 (75.0) | 9 (22.5) | 1 (2.5) | 10 (25) |
| Usual activities | 26 (65.0) | 11 (27.5) | 3 (7.5) | 14 (35) |
| Pain/discomfort | 27 (67.5) | 12 (30.0) | 1 (2.5) | 13 (32.5) |
| Anxiety/depression | 35 (87.5) | 4 (10.0) | 1 (2.5) | 5 (12.5) |
| Total | 142 (71.0) | 52 (26.0) | 6 (3.0) | 58 (29.0) |
